# Supplementary material for: A human iPSC-array-based GWAS identifies a virus susceptibility locus in the NDUFA4 gene and functional variants
Source: PubMed Central journal article supplement (PMC9550219; doi:10.1016/j.stem.2022.09.008), 2022-10-06
Supplement: mmc1.pdf [file mmc1.pdf]

## Supplemental Information

### **A human iPSC-array-based GWAS identifies a virus susceptibility locus in the NDUFA4 gene and functional variants**

**Yuling Han, Lei Tan, Ting Zhou, Liuliu Yang, Lucia Carrau, Laretta A. Lacko, Mohsan Saeed, Jiajun Zhu, Zeping Zhao, Benjamin E. Nilsson-Payant, Filipe Tenorio Lira Neto, Clare Cahir, Alice Maria Giani, Jin Chou Chai, Yang Li, Xue Dong, Dorota Moroziewicz, The NYSCF Global Stem Cell Array Team, Daniel Paull, Tuo Zhang, Soyeon Koo, Christina Tan, Ron Danziger, Qian Ba, Lingling Feng, Zhengming Chen, Aaron Zhong, Gilbert J. Wise, Jenny Z. Xiang, Hui Wang, Robert E. Schwartz, Benjamin R. tenOever, Scott A. Noggle, Charles M. Rice, Qibin Qi, Todd Evans, and Shuibing Chen**

# Figure S1

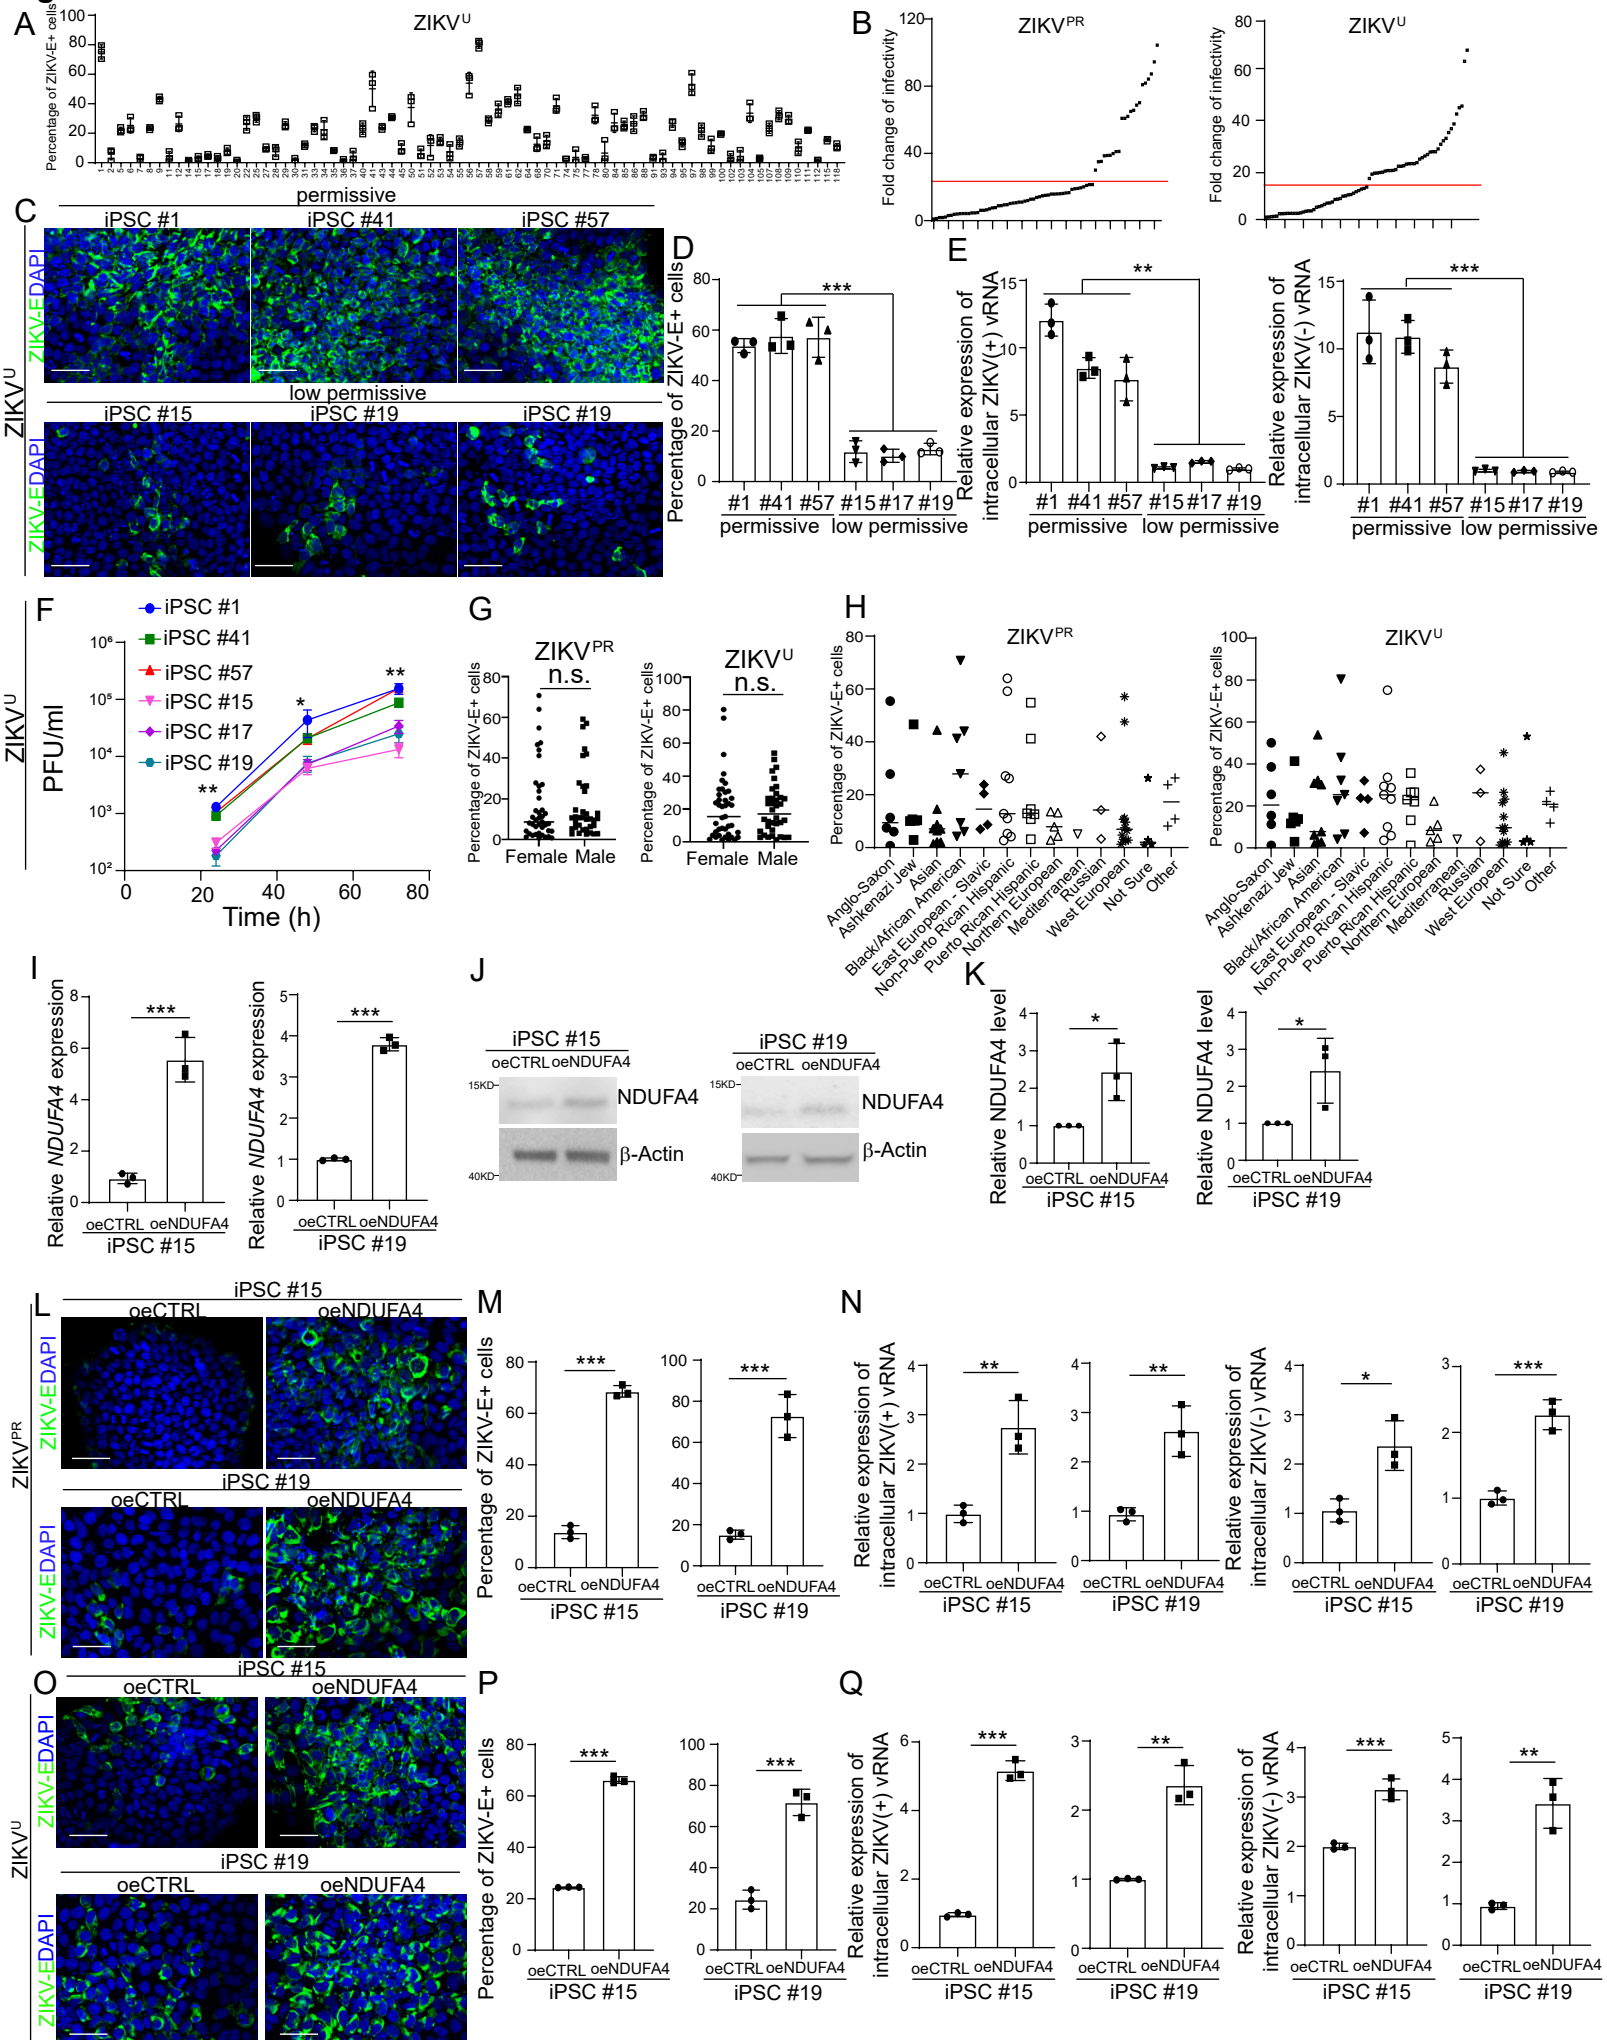

## SUPPLEMENTAL FIGURES

### Figure S1, related to Figure 1. Primary data of iPSC screening.

**(A)** The percentage of ZIKV-E positive cells of all iPSC lines upon ZIKV<sup>U</sup> infection (ZIKV<sup>U</sup>, MOI=0.25). Three biological replicates were used to calculate the infectivity (each replicate includes one well of a 96-well plate, and biological replicates were performed on different days).

**(B)** The curve trends of infectivity of iPSC lines at 72 hpi (ZIKV<sup>PR</sup>, MOI=1; ZIKV<sup>U</sup>, MOI=0.25).

**(C and D)** Representative confocal images (C) and the quantification (D) of ZIKV-E staining of permissive cell lines: iPSC #1, iPSC #41 and iPSC #57 or low permissive cell lines: iPSC #15, iPSC #17 and iPSC #19 at 72 hpi (ZIKV<sup>U</sup>, MOI=0.15). Scale bar=50  $\mu$ m.

**(E)** qRT-PCR analysis of (+) and (-) ZIKV vRNA strands in permissive cell lines: iPSC #1, iPSC #41 and iPSC #57 or low permissive cell lines: iPSC #15, iPSC #17 and iPSC #19 at 72 hpi (ZIKV<sup>U</sup>, MOI=0.15). The value was normalized to *ACTB*.

**(F)** Multiple step growth curve of ZIKV in the supernatant of permissive cell lines: iPSC #1, iPSC #41 and iPSC #57 or low permissive cell lines: iPSC #15, iPSC #17 and iPSC #19 (ZIKV<sup>U</sup>, MOI=0.15).

**(G)** Comparison of the infection rate between two groups of iPSC lines derived from female or male donors.

**(H)** Comparison of the infection rate among groups of iPSC lines derived from distinct ethnic groups.

**(I)** qRT-PCR analysis of *NDUFA4* mRNA expression levels in iPSC #15-oeCTRL, iPSC #15-oeNDUFA4 hiPSCs or iPSC #19-oeCTRL, iPSC #19-oeNDUFA4 hiPSCs. The value was normalized to *ACTB*.

**(J and K)** Western blotting and quantification analysis of *NDUFA4* protein expression levels in iPSC #15-oeCTRL, iPSC #15-oeNDUFA4 hiPSCs or iPSC #19-oeCTRL, iPSC #19-oeNDUFA4 hiPSCs.  $\beta$ -Actin was used as a loading control.

**(L and M)** Representative confocal images (L) and the quantification (M) of ZIKV-E staining in iPSC #15-oeCTRL, iPSC #15-oeNDUFA4 hiPSCs or iPSC #19-oeCTRL, iPSC #19-oeNDUFA4 hiPSCs at 72 hpi (ZIKV<sup>PR</sup>, MOI=1). Scale bar=50  $\mu$ m.

**(N)** qRT-PCR analysis of (+) and (-) ZIKV vRNA strands in iPSC #15-oeCTRL, iPSC #15-oeNDUFA4 hiPSCs or iPSC #19-oeCTRL, iPSC #19-oeNDUFA4 hiPSCs at 72 hpi (ZIKV<sup>PR</sup>, MOI=1). The value was normalized to *ACTB*.

**(O and P)** Representative confocal images (O) and the quantification (P) of ZIKV-E staining in iPSC #15-oeCTRL, iPSC #15-oeNDUFA4 hiPSCs or iPSC #19-oeCTRL, iPSC #19-oeNDUFA4 hiPSCs at 72 hpi (ZIKV<sup>U</sup>, MOI=0.15). Scale bar=50  $\mu$ m.

**(Q)** qRT-PCR analysis of (+) and (-) ZIKV vRNA strands in iPSC #15-oeCTRL, iPSC #15-oeNDUFA4 hiPSCs or iPSC #19-oeCTRL, iPSC #19-oeNDUFA4 hiPSCs at 72 hpi (ZIKV<sup>U</sup>, MOI=0.15). The value was normalized to *ACTB*.

Data are representative of at least three independent experiments. Data are shown as mean  $\pm$  SD. *P* values were calculated by unpaired two-tailed Student's t-test; n.s. no significance, \**P* < 0.05, \*\**P* < 0.01, and \*\*\**P* < 0.001.

**Figure S2**

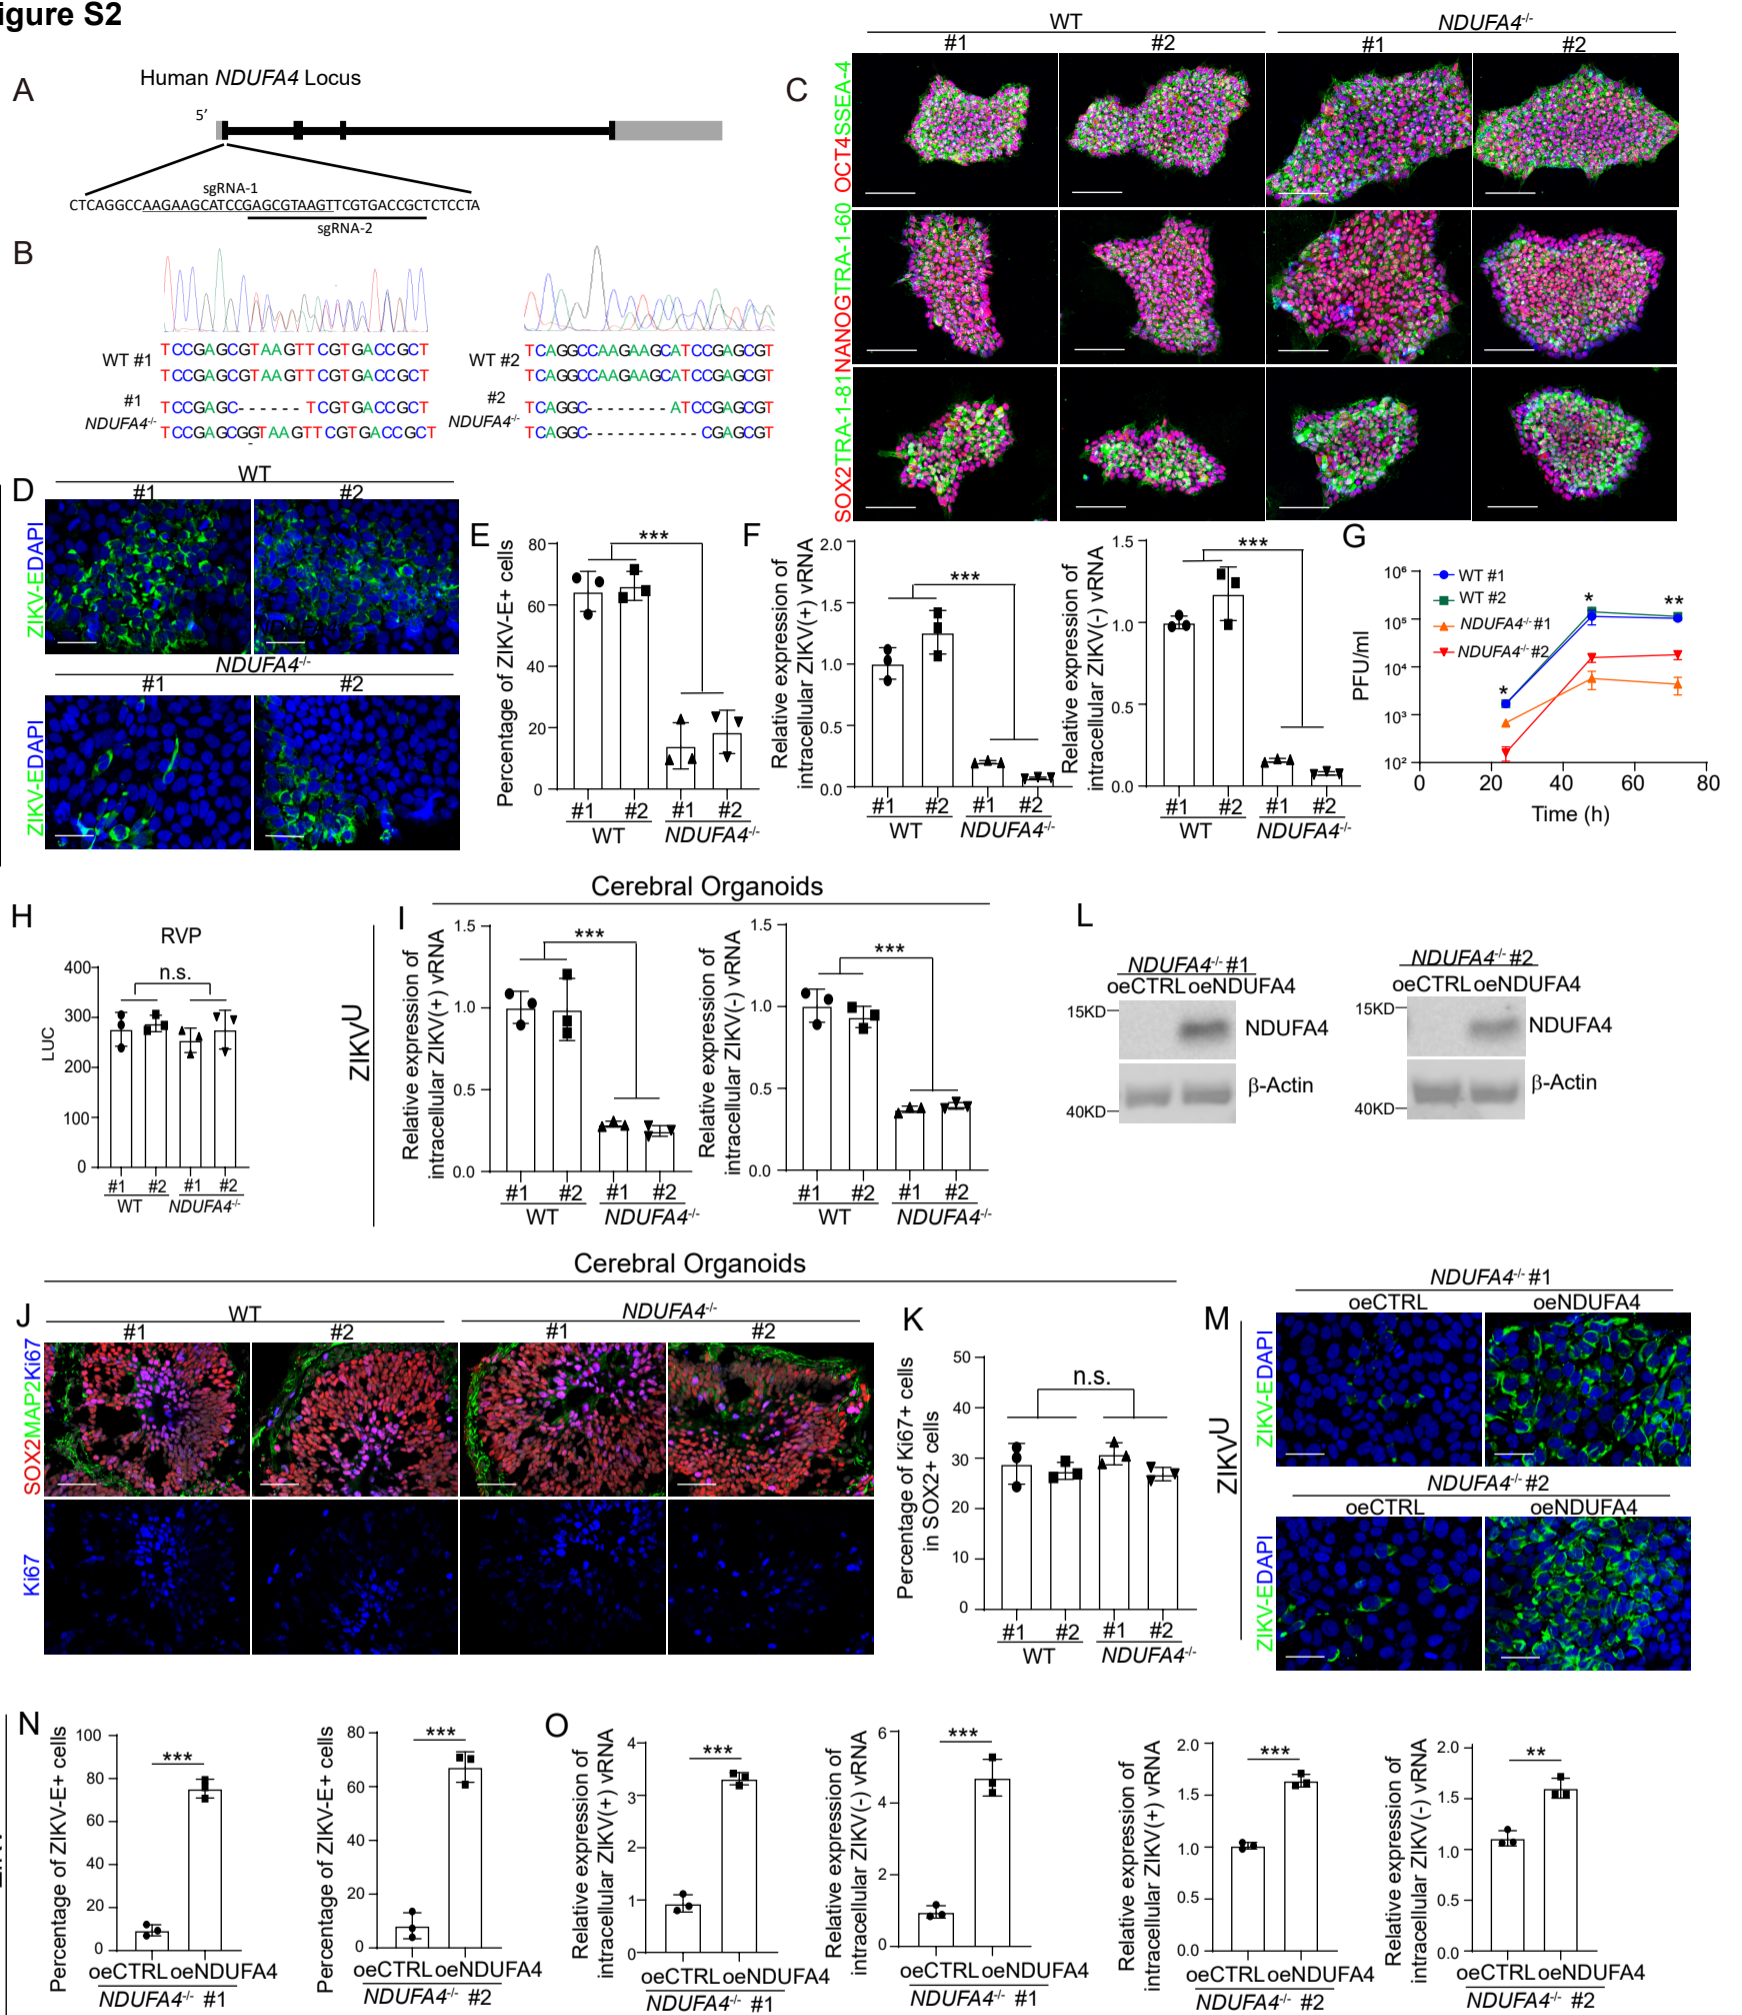



**Figure S2, related to Figure 2. *NDUFA4* is associated with ZIKV infection.**

**(A)** Scheme of sgRNA to create *NDUFA4*<sup>-/-</sup> iPSC lines.

**(B)** DNA sequencing result of *NDUFA4*<sup>-/-</sup> #1 and *NDUFA4*<sup>-/-</sup> #2.

**(C)** WT and *NDUFA4*<sup>-/-</sup> iPSCs express pluripotency markers. Scale bar=50 μm.

**(D and E)** Immunocytochemistry staining (D) and the quantification (E) of ZIKV-E<sup>+</sup> cells from WT or *NDUFA4*<sup>-/-</sup> iPSCs at 72 hpi (ZIKV<sup>U</sup>, MOI=0.15). Scale bar=50 μm.

**(F)** qRT-PCR analysis of (+) and (-) ZIKV vRNA strands in ZIKV infected WT or *NDUFA4*<sup>-/-</sup> hiPSCs at 72 hpi (ZIKV<sup>U</sup>, MOI=0.15). The value was normalized to *ACTB*.

**(G)** Multiple step growth curve of ZIKV virus in the supernatant of ZIKV infected WT or *NDUFA4*<sup>-/-</sup> hiPSCs (ZIKV<sup>U</sup>, MOI=0.15).

**(H)** Luciferase activity of WT or *NDUFA4*<sup>-/-</sup> hiPSCs at 24 hpi with ZIKV RVP.

**(I)** qRT-PCR analysis of (+) and (-) ZIKV vRNA strands in cerebral organoids derived from WT or *NDUFA4*<sup>-/-</sup> hiPSCs (ZIKV<sup>U</sup>, 5 × 10<sup>5</sup> PFU/ml). Cerebral organoids were age-matched and collected at day 20, then infected with ZIKV for 24 hr. After removal of virus-containing medium, organoids were maintained in organoid medium for an additional 3 days. The value was normalized to *ACTB*.

**(J and K)** Representative images (J) and quantification (K) of Ki67<sup>+</sup> cells in SOX2<sup>+</sup> cells in cerebral organoids derived from WT or *NDUFA4*<sup>-/-</sup> hiPSCs. Cerebral organoids were age-matched and collected at day 20. Scale bar=50 μm.

**(L)** Western blotting analysis of the expression levels of *NDUFA4* in *NDUFA4*<sup>-/-</sup>-oeCTRL or *NDUFA4*<sup>-/-</sup>-oe*NDUFA4* hiPSCs. β-Actin was used as a loading control.

**(M and N)** Representative confocal images (M) and the quantification (N) of ZIKV-E<sup>+</sup> cells from *NDUFA4*<sup>-/-</sup>-oeCTRL or *NDUFA4*<sup>-/-</sup>-oe*NDUFA4* hiPSCs at 72 hpi (ZIKV<sup>U</sup>, MOI=0.15). Scale bar=50 μm.

**(O)** qRT-PCR analysis of (+) and (-) ZIKV vRNA strands in ZIKV infected *NDUFA4*<sup>-/-</sup>-oeCTRL or *NDUFA4*<sup>-/-</sup>-oe*NDUFA4* hiPSCs at 72 hpi (ZIKV<sup>U</sup>, MOI=0.15). The value was normalized to *ACTB*.

Data are representative of at least three independent experiments. Data are shown as mean ± SD. For comparison with more than two samples, *P* values were calculated by two-way ANOVA analysis; For comparison with two samples, *P* values were calculated by an unpaired two-tailed Student's t-test; n.s. no significance, \*\**P* < 0.01, and \*\*\**P* < 0.001.

**Figure S3**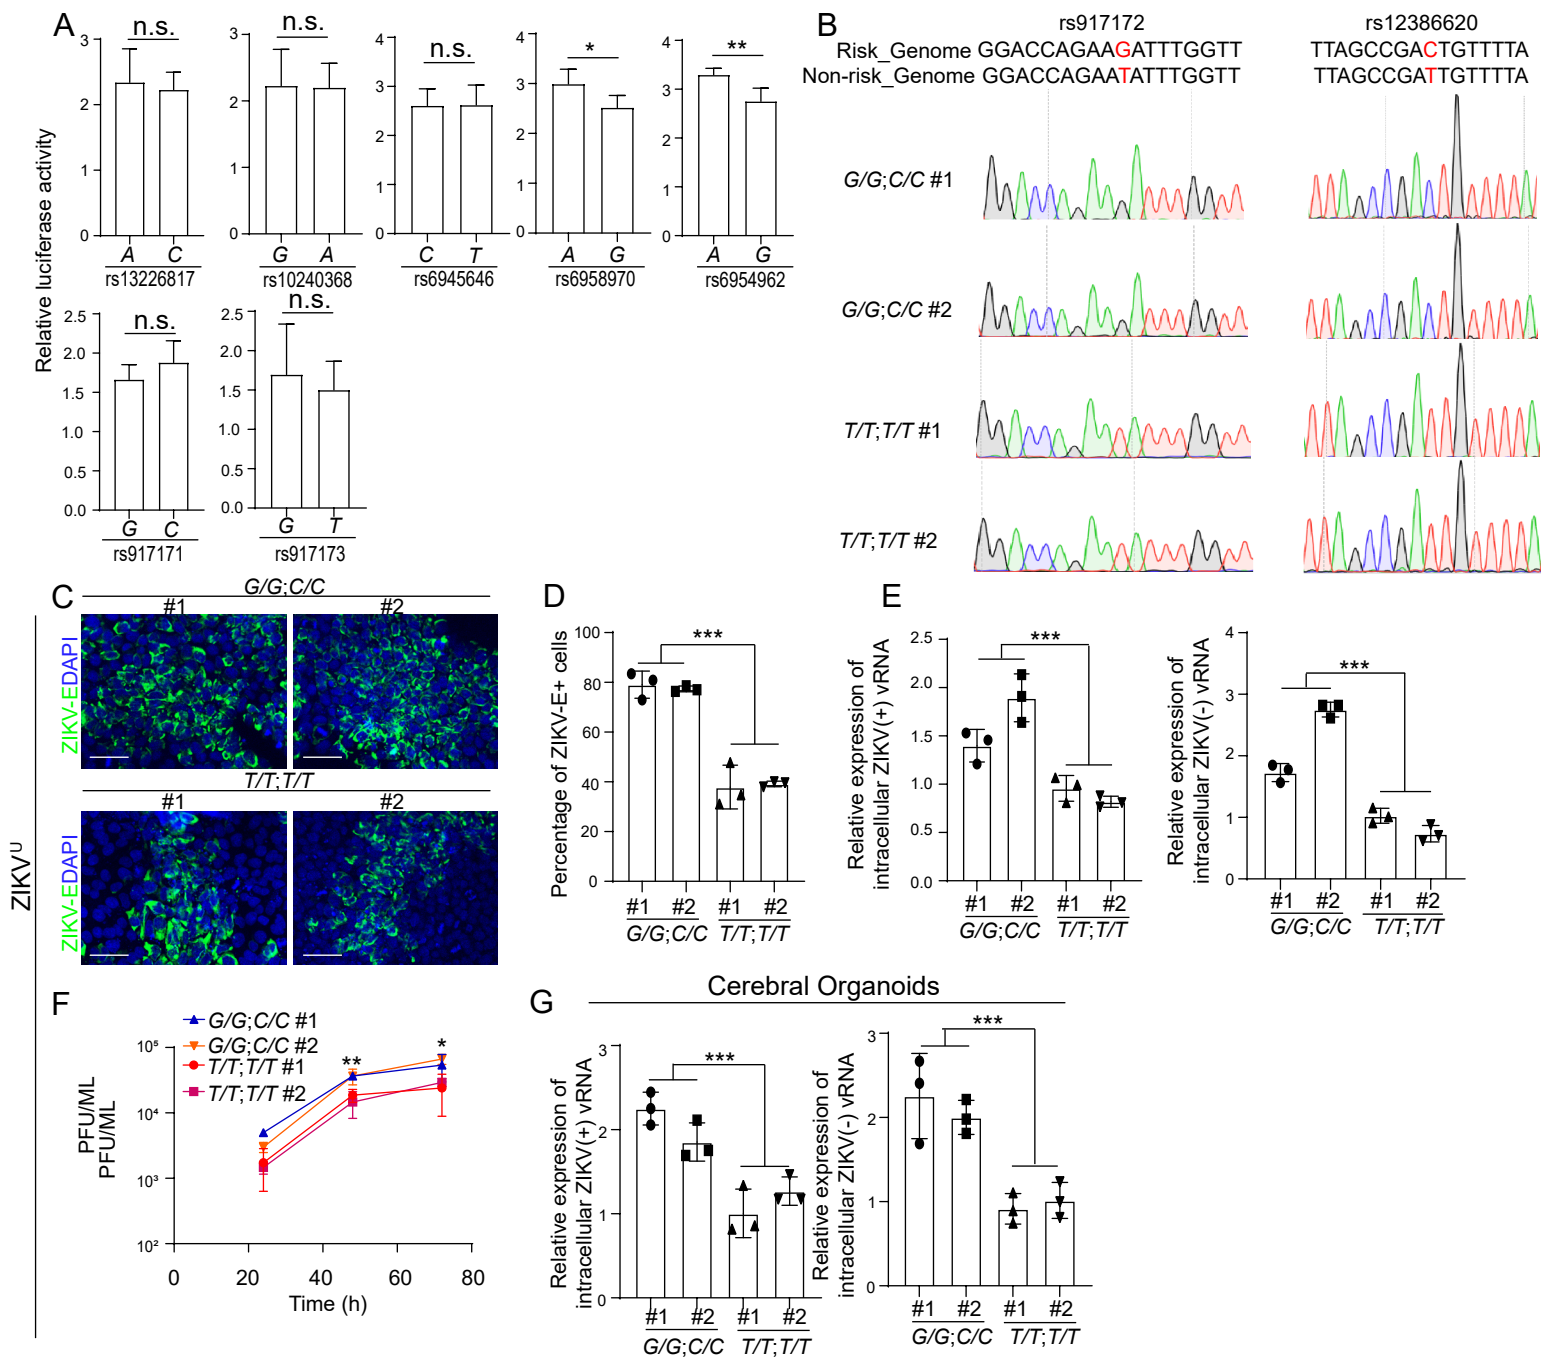

**Figure S3, related to Figure 3. SNPs of *NDUFA4* promote the infection of ZIKV virus.**

**(A)** Relative luciferase activity of reporters carrying risk/non-risk alleles.

**(B)** DNA sequencing results of hiPSC lines carrying risk (*G/G*; *C/C*) or non-risk (*T/T*; *T/T*) alleles.

**(C and D)** Representative confocal images (C) and the quantification (D) of ZIKV-E staining in ZIKV infected hiPSC lines carrying risk (*G/G*; *C/C*) or non-risk (*T/T*; *T/T*) alleles at 72 hpi (ZIKV<sup>U</sup>, MOI=0.15). Scale bar=50  $\mu$ m.

**(E)** qRT-PCR analysis of (+) and (-) ZIKV vRNA strands in ZIKV infected hiPSC lines carrying risk (*G/G*; *C/C*) or non-risk (*T/T*; *T/T*) alleles at 72 hpi (ZIKV<sup>U</sup>, MOI=0.15). The value was normalized to *ACTB*.

**(F)** Multiple-step growth curve of ZIKV in the supernatant of ZIKV infected hiPSC lines carrying risk (*G/G*; *C/C*) or non-risk (*T/T*; *T/T*) alleles (ZIKV<sup>U</sup>, MOI=0.15).

**(G)** qRT-PCR analysis of (+) and (-) ZIKV vRNA strands in cerebral organoids derived from hiPSC lines carrying risk (*G/G*; *C/C*) or non-risk (*T/T*; *T/T*) alleles (ZIKV<sup>U</sup>,  $5 \times 10^5$  PFU/ml). Cerebral organoids were age-matched and collected at day 20, then infected with ZIKV for 24 hr. After the removal of virus-containing medium, organoids were maintained in the organoid medium for an additional 3 days. The value was normalized to *ACTB*.

Data are representative of at least three independent experiments. Data are shown as mean  $\pm$  SD. For comparison with more than two samples, *P* values were calculated by two-way ANOVA analysis; For comparison with two samples, *P* values were calculated by an unpaired two-tailed Student's t-test; \**P* < 0.05, \*\**P* < 0.01, and \*\*\**P* < 0.001.

**Figure S4**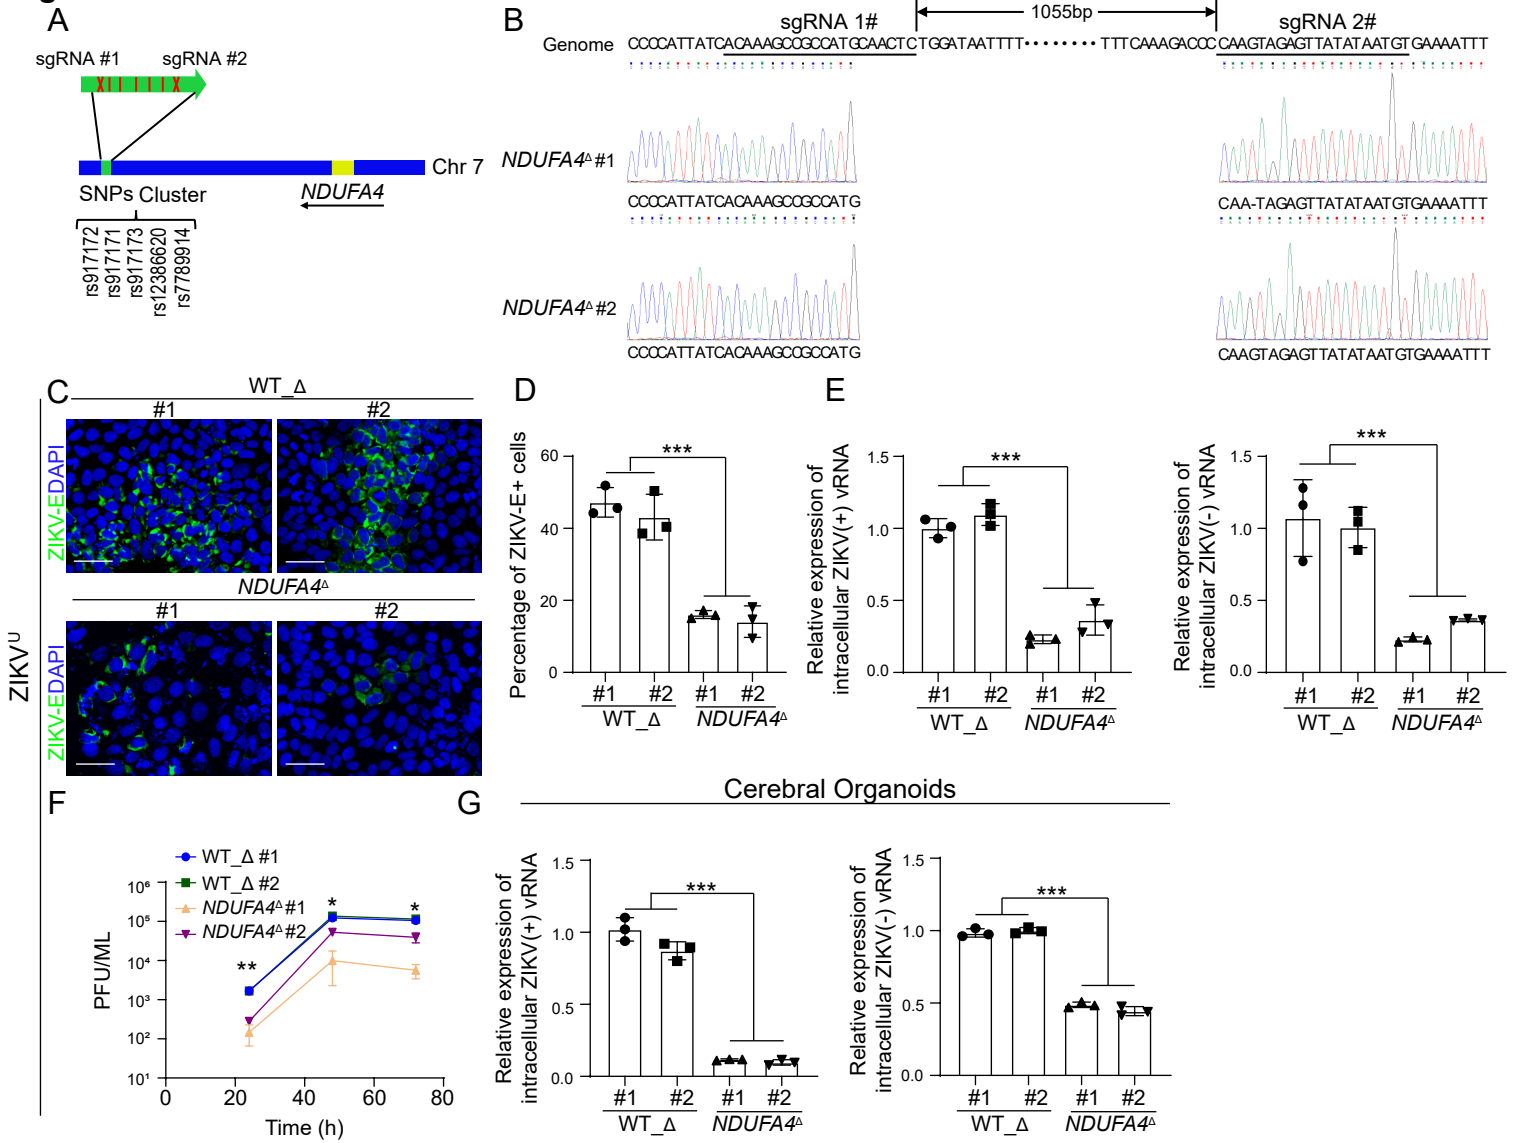



**Figure S4, related to Figure 4. Deletion of *cis*-regulatory region decreased the sensitivity to ZIKV infection.**

**(A)** Relative location of the *NDUFA4* gene and a cluster of SNPs.

**(B)** Sequencing results of WT\_Δ and *NDUFA4*<sup>Δ</sup> hiPSC lines.

**(C and D)** Representative images (C) and the quantification (D) of ZIKV-E staining in ZIKV infected WT\_Δ or *NDUFA4*<sup>Δ</sup> hiPSCs at 72 hpi (ZIKV<sup>U</sup>, MOI=0.15). Scale bar=50 μm.

**(E)** qRT-PCR analysis of (+) and (-) ZIKV vRNA strands in ZIKV infected WT\_Δ or *NDUFA4*<sup>Δ</sup> hiPSCs at 72 hpi (ZIKV<sup>U</sup>, MOI=0.15). The value was normalized to *ACTB*.

**(F)** Multiple step growth curve of ZIKV virus in the supernatant of ZIKV infected WT\_Δ or *NDUFA4*<sup>Δ</sup> hiPSCs (ZIKV<sup>U</sup>, MOI=0.15).

**(G)** qRT-PCR analysis of (+) and (-) ZIKV vRNA strands of cerebral organoids derived from WT\_Δ and *NDUFA4*<sup>Δ</sup> hiPSCs (ZIKV<sup>U</sup>, 5 × 10<sup>5</sup> PFU/ml). Cerebral organoids were age-matched and collected at day 20, then infected with ZIKV for 24 hr. After the removal of virus-containing medium, organoids were maintained in the organoid medium for an additional 3 days. The value was normalized to *ACTB*.

Data are representative of at least three independent experiments. Data are shown as mean ± SD. *P* values were calculated by two-way ANOVA analysis; \**P* < 0.05, \*\**P* < 0.01, and \*\*\**P* < 0.001.

**Figure S5**

**A** Airway Organoids

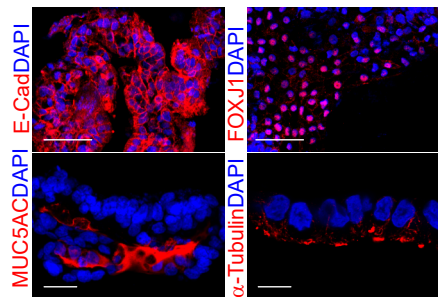

**B**

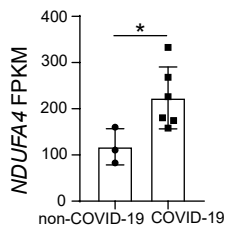

**C**

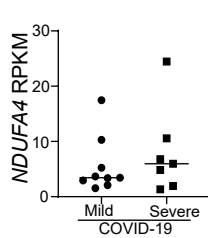

**Figure S5, related to Figure 5. NDUFA4 expression in COVID-19 patients.**

**(A)** Characterization of human iPSC-derived airway organoids. E-Cad, FOXJ1 and MUC5AC images: Scale bar=50  $\mu\text{m}$ ;  $\alpha$ -Tubulin image: Scale bar=10  $\mu\text{m}$ .

**(B)** RNA-seq results of NDUFA4 in COVID-19 patients and non-COVID-19 donors (GSE155241) (Han et al., 2021).

**(C)** RNA-seq results of NDUFA4 in severe COVID-19 and mild COVID-19 (GSE196822) (Banerjee et al., 2022).

Data are representative of at least three independent experiments. Data are shown as mean  $\pm$  SD. *P* values were calculated by unpaired two-tailed Student's *t*-test; \**P* < 0.05.

**Figure S6**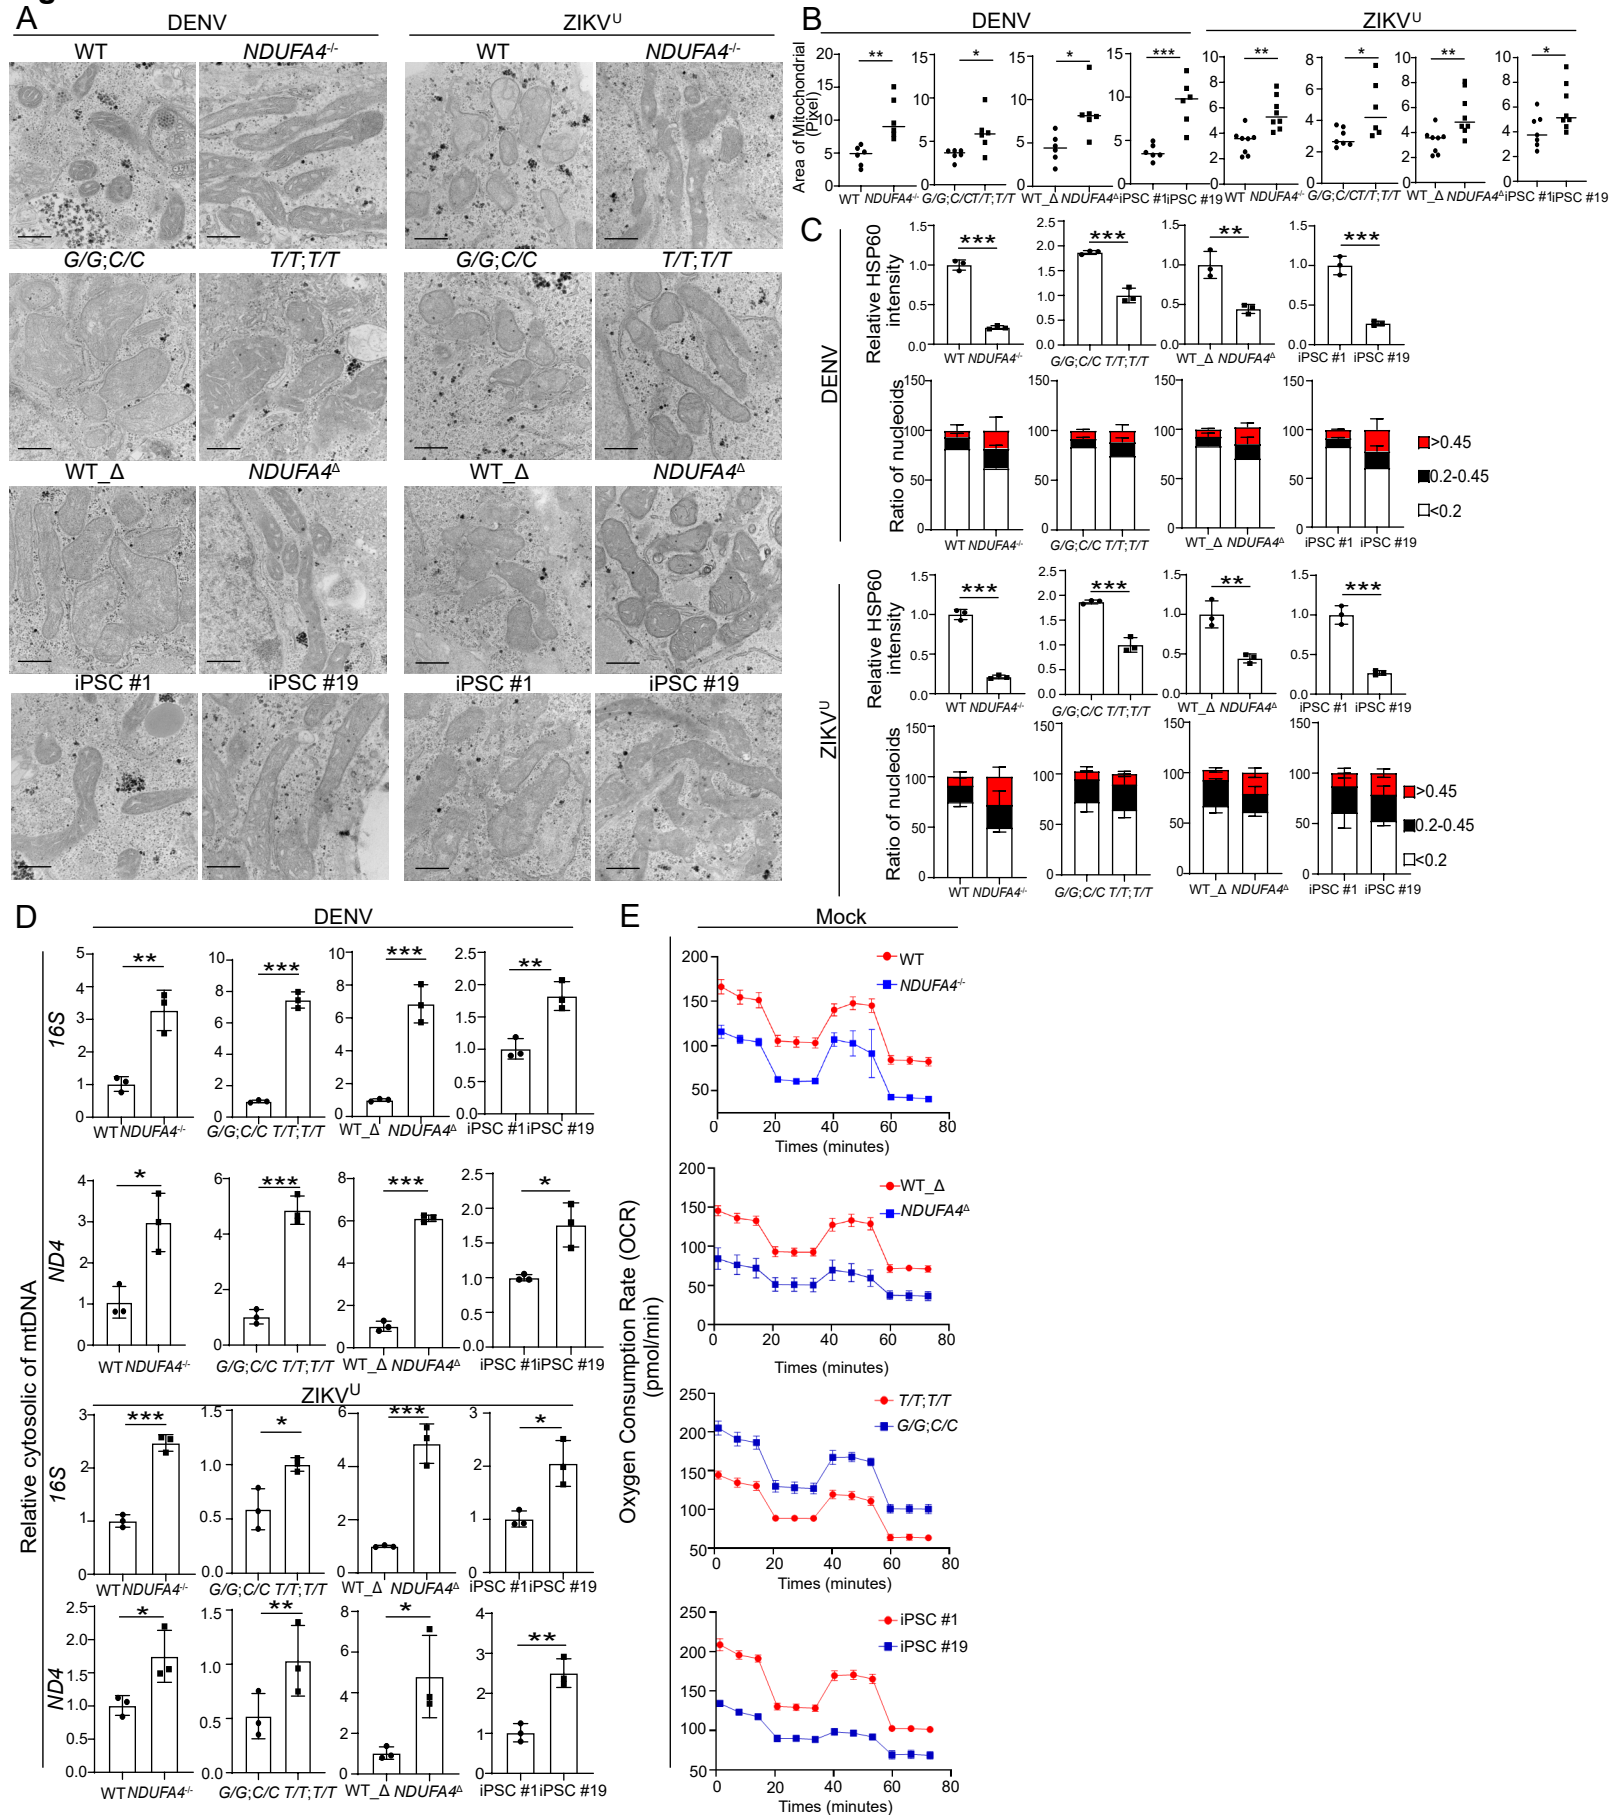



**Figure S6, related to Figure 6. Loss or reduction of NDUFA4 causes mitochondrial DNA leaking.**

**(A and B)** Representative electron microscopy images (A) and the quantification of mitochondrial size (B) of iPSC lines with DENV or ZIKV infection at 48 hpi (DENV, MOI=1; ZIKV<sup>U</sup>, MOI=0.15). 4 groups: WT v.s. *NDUFA4*<sup>-/-</sup>; risk (*G/G*; *C/C*) v.s. non-risk (*T/T*; *T/T*); WT\_Δ v.s. *NDUFA4*<sup>Δ</sup>; and iPSC #1 v.s. iPSC #19. Scale bars= 500 nm.

**(C)** Quantification of HSP60 staining intensity and nucleoid area in DENV or ZIKV infected conditions (DENV, MOI=1; ZIKV<sup>U</sup>, MOI=0.15).

**(D)** qPCR analysis of mitochondrial DNA leakage in cytoplasm after DENV or ZIKV infection in hiPSCs at 48 hpi (DENV, MOI=1; ZIKV<sup>U</sup>, MOI=0.15). 4 groups: WT v.s. *NDUFA4*<sup>-/-</sup>; risk (*G/G*; *C/C*) v.s. non-risk (*T/T*; *T/T*); WT\_Δ v.s. *NDUFA4*<sup>Δ</sup>; and iPSC #1 v.s. iPSC #19.

**(E)** Analysis of oxygen consumption rate (OCR) in 4 groups of hiPSCs. 4 groups: WT v.s. *NDUFA4*<sup>-/-</sup>; risk (*G/G*; *C/C*) v.s. non-risk (*T/T*; *T/T*); WT\_Δ v.s. *NDUFA4*<sup>Δ</sup>; and iPSC #1 v.s. iPSC #19.

Data are representative of at least three independent experiments. Data are shown as mean ± SD. *P* values were calculated by an unpaired two-tailed Student's t-test; \**P* < 0.05, \*\**P* < 0.01, and \*\*\**P* < 0.001.

**Figure S7**

**A**

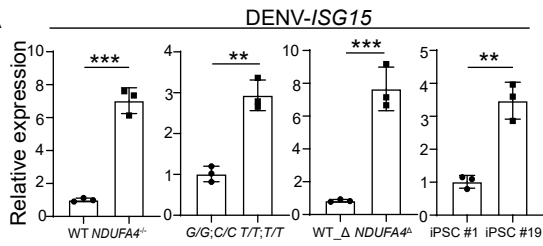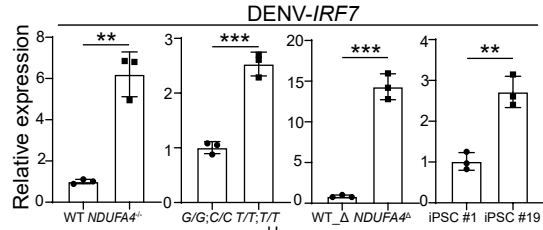

**B**

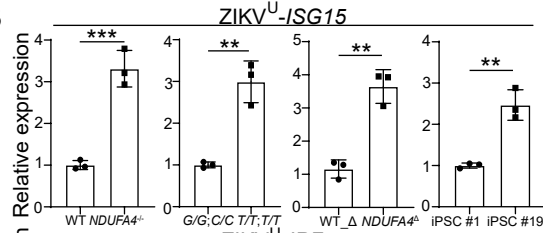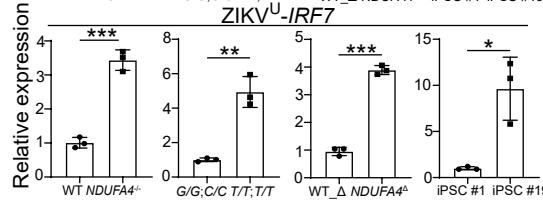

**C**

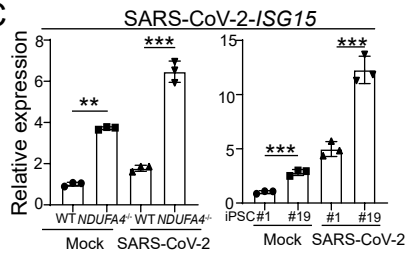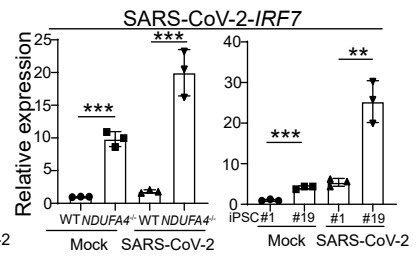

**D**

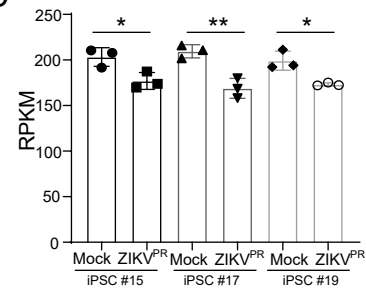

**Figure S7, related to Figure 7. Loss or reduction of NDUFA4 triggers type 1 interferon signaling.**

**(A)** qRT-PCR analysis of *ISG15* and *IRF7* mRNA expression levels with DENV infection at 48 hpi (DENV, MOI=1). 4 groups: WT v.s. *NDUFA4*<sup>-/-</sup>; risk (*G/G*; *C/C*) v.s. non-risk (*T/T*; *T/T*); WT\_Δ v.s. *NDUFA4*<sup>Δ</sup>; and iPSC #1 v.s. iPSC #19. The value was normalized to *ACTB*.

**(B)** qRT-PCR analysis of *ISG15* and *IRF7* mRNA expression levels with ZIKV infection at 48 hpi (ZIKV<sup>U</sup>, MOI=0.15). 4 groups: WT v.s. *NDUFA4*<sup>-/-</sup>; risk (*G/G*; *C/C*) v.s. non-risk (*T/T*; *T/T*); WT\_Δ v.s. *NDUFA4*<sup>Δ</sup>; and iPSC #1 v.s. iPSC #19. The value was normalized to *ACTB*.

**(C)** qRT-PCR analysis of *ISG15* and *IRF7* mRNA expression levels with mock and SARS-CoV-2 infection at 24 hpi (SARS-CoV-2, MOI=0.1) in iPSC-derived airway organoids. 4 groups: WT v.s. *NDUFA4*<sup>-/-</sup>; risk (*G/G*; *C/C*) v.s. non-risk (*T/T*; *T/T*); WT\_Δ v.s. *NDUFA4*<sup>Δ</sup>; and iPSC #1 v.s. iPSC #19. The value was normalized to *ACTB*.

**(D)** RNA sequencing of *NDUFA4* expression levels in low-permissive hiPSC lines with ZIKV infection at 72 hpi (ZIKV<sup>PR</sup>, MOI=1).

Data are representative of at least three independent experiments. Data are shown as mean ± SD. *P* values were calculated by an unpaired two-tailed Student's t-test; \**P* < 0.05, \*\**P* < 0.01, and \*\*\**P* < 0.001.

**Table S1. Information of iPSC array, related to Figure 1.**

| <b>iPSC line</b> | <b>Gender</b> | <b>Ethnicity</b>                                |
|------------------|---------------|-------------------------------------------------|
| 1                | F             | Hispanic (Not Puerto Rican or Mexican)          |
| 2                | F             | Hispanic (Not Puerto Rican or Mexican)          |
| 5                | F             | Other                                           |
| 6                | F             | Hispanic (Not Puerto Rican or Mexican)          |
| 7                | F             | Not Sure                                        |
| 8                | M             | Hispanic (Not Puerto Rican or Mexican)          |
| 9                | M             | Black/African American (Not of Hispanic Origin) |
| 11               | F             | Black/African American (Not of Hispanic Origin) |
| 12               | M             | Russian                                         |
| 14               | F             | Anglo-Saxon                                     |
| 15               | M             | Russian                                         |
| 17               | F             | Northern European                               |
| 18               | M             | Not Sure                                        |
| 19               | F             | Asian                                           |
| 20               | F             | Puerto Rican Hispanic                           |
| 22               | F             | Puerto Rican Hispanic                           |
| 25               | F             | Asian                                           |
| 27               | F             | West European                                   |
| 28               | F             | West European                                   |
| 29               | F             | Anglo-Saxon   West European                     |
| 30               | F             | West European                                   |
| 31               | M             | Other                                           |
| 33               | F             | West European                                   |
| 34               | F             | Northern European                               |
| 35               | F             | Northern European                               |
| 36               | M             | West European                                   |
| 37               | F             | Not Sure                                        |
| 40               | M             | Puerto Rican Hispanic                           |
| 41               | M             | Anglo-Saxon                                     |
| 43               | F             | East European – Slavic   Russian                |
| 44               | F             | Asian                                           |
| 45               | M             | West European                                   |
| 50               | F             | Russian                                         |
| 51               | F             | Asian                                           |
| 52               | M             | Ashkenazi Jew                                   |
| 53               | F             | West European                                   |
| 54               | M             | East European – Slavic                          |



|     |   |                                                 |
|-----|---|-------------------------------------------------|
| 55  | M | Ashkenazi Jew                                   |
| 56  | M | Asian                                           |
| 57  | F | Black/African American (Not of Hispanic Origin) |
| 58  | F | Hispanic (Not Puerto Rican or Mexican)          |
| 59  | F | Puerto Rican Hispanic                           |
| 61  | F | Ashkenazi Jew                                   |
| 62  | M | West European                                   |
| 64  | F | Black/African American (Not of Hispanic Origin) |
| 68  | M | Ashkenazi Jew                                   |
| 70  | M | Ashkenazi Jew                                   |
| 71  | M | Anglo-Saxon                                     |
| 74  | M | West European                                   |
| 75  | M | Hispanic (Not Puerto Rican or Mexican)          |
| 77  | F | Asian                                           |
| 78  | F | Black/African American (Not of Hispanic Origin) |
| 80  | M | Black/African American (Not of Hispanic Origin) |
| 84  | M | Other                                           |
| 85  | M | Black/African American (Not of Hispanic Origin) |
| 86  | M | Puerto Rican Hispanic                           |
| 88  | F | East European – Slavic                          |
| 89  | F | Anglo-Saxon                                     |
| 92  | F | Russian                                         |
| 94  | M | West European                                   |
| 95  | M | Puerto Rican Hispanic                           |
| 97  | F | Not Sure                                        |
| 98  | F | West European                                   |
| 99  | F | Anglo-Saxon                                     |
| 100 | M | Other                                           |
| 102 | F | Northern European                               |
| 103 | M | Mediterranean                                   |
| 104 | M | Hispanic (Not Puerto Rican or Mexican)          |
| 105 | M | West European                                   |
| 107 | M | East European – Slavic                          |
| 108 | M | Asian                                           |
| 109 | M | Hispanic (Not Puerto Rican or Mexican)          |
| 110 | F | Hispanic (Not Puerto Rican or Mexican)          |
| 111 | M | Puerto Rican Hispanic                           |
| 112 | F | Asian   Other                                   |
| 115 | F | Anglo-Saxon                                     |
| 118 | M | Northern European                               |

**Table S2. Information of top 100 SNPs identified from GWAS, related to Figure 1.**

Please see the Excel file.

**Table S3. RPKM values of coding and non-coding RNAs located in 1Mb upstream or downstream of SNP cluster region, related to Figure 1.**

| Ensembl Id and Gene name               | RPKM ips#1-1 | RPKM ips#1-2 | RPKM ips#1-3 | Location                    |
|----------------------------------------|--------------|--------------|--------------|-----------------------------|
| ENSG00000271526                        | 0            | 0            | 0            | chr7: 9,084,022-9,084,175   |
| ENSG00000278446                        | 0            | 0            | 0            | chr7: 9,170,948-9,171,273   |
| ENSG00000233876<br><i>GAPDHP68</i>     | 0            | 0            | 0            | chr7: 9,614,908-9,616,186   |
| ENSG00000271077<br><i>PER4</i>         | 0            | 0            | 0            | chr7: 9,634,270-9,635,817   |
| ENSG00000197320<br><i>LOC340268</i>    | 0.596415     | 0.720182     | 0.272861     | chr7: 9,726,100-9,728,274   |
| ENSG00000234710<br><i>LOC105375148</i> | 0            | 0            | 0            | chr7: 9,734,270-9,769,513   |
| ENSG00000270611                        | 0            | 0            | 0            | chr7: 9,850,924-9,851,386   |
| ENSG00000235431<br><i>LOC105375146</i> | 0            | 0            | 0            | chr7: 9,961,024-9,986,360   |
| ENSG00000212422                        | 0            | 0            | 0            | chr7: 10,222,797-10,223,011 |
| ENSG00000283117                        | 0            | 0.016762     | 0            | chr7: 10,449,820-10,779,944 |
| ENSG00000229091<br><i>HSPA8P8</i>      | 0            | 0            | 0            | chr7: 10,451,236-10,453,500 |
| ENSG00000234356<br><i>LOC101154643</i> | 0            | 0            | 0            | chr7: 10,476,400-10,477,346 |
| ENSG00000236414<br><i>LOC100131472</i> | 0            | 0            | 0            | chr7: 10,702,672-10,707,538 |
| ENSG00000201774                        | 0            | 0            | 0            | chr7: 10,901,978-10,902,074 |
| ENSG00000189043<br><i>NDUFA4</i>       | 91.89732     | 86.52564     | 86.59656     | chr7: 10,931,951-10,940,256 |

**Table S4. List of sgRNAs and shRNAs used to create knockout hiPSC lines, related to Figure 2.**

| Cell line                       | sgRNA/shRNA                 |
|---------------------------------|-----------------------------|
| <i>NDUFA4</i> <sup>-/-</sup> #1 | <i>ACTTACGCTCGGATGCTTCT</i> |
| <i>NDUFA4</i> <sup>-/-</sup> #2 | <i>AGCGGTCACGAACTTACGCT</i> |
| rs917172-G/G                    | <i>AGTTCATGGACCAGAATATT</i> |
| rs12386620-C/C                  | <i>GCAGAGAATTATAAAACAAT</i> |
| <i>NDUFA4</i> <sup>Δ</sup>      | <i>ACAAAGCCGCCATGCAACTC</i> |
| <i>NDUFA4</i> <sup>Δ</sup>      | <i>CAAGTAGAGTTATATAATGT</i> |

**Table S5. Patient information, related to Figure 3.**

| <b>Patient ID</b> | <b>Age</b> | <b>Gender</b> | <b>IgG</b> | <b>IgM</b> | <b>RS917172</b> | <b>Rs12386620</b> |
|-------------------|------------|---------------|------------|------------|-----------------|-------------------|
| 5                 | 47         | Male          | positive   | negative   | <i>G</i>        | <i>C</i>          |
| 6                 | 31         | Male          | positive   | negative   | <i>T</i>        | <i>T</i>          |
| 8                 | 35         | Male          | positive   | negative   | <i>T</i>        | <i>T</i>          |
| 11                | 37         | Male          | positive   | negative   | <i>T</i>        | <i>T</i>          |
| 19                | 45         | Male          | positive   | negative   | <i>G</i>        | <i>C</i>          |
| 20                | 36         | Male          | positive   | negative   | <i>T</i>        | <i>T</i>          |
| 21                | 30         | Male          | positive   | negative   | <i>T</i>        | <i>T</i>          |
| 22                | 34         | Male          | positive   | negative   | <i>T</i>        | <i>T</i>          |
| 23                | 29         | Male          | positive   | negative   | <i>T</i>        | <i>T</i>          |
| 26                | 50         | Male          | positive   | negative   | <i>G</i>        | <i>C</i>          |
| 28                | 38         | Male          | positive   | negative   | <i>T/G</i>      | <i>T/C</i>        |
| 33                | 37         | Male          | positive   | negative   | <i>T</i>        | <i>T</i>          |
| 7                 | 30         | Male          | negative   | negative   | <i>G</i>        | <i>C</i>          |
| 9                 | 35         | Male          | negative   | negative   | <i>T</i>        | <i>T</i>          |
| 14                | 32         | Male          | negative   | negative   | <i>T</i>        | <i>T</i>          |
| 15                | 32         | Male          | negative   | negative   | <i>T</i>        | <i>T</i>          |
| 18                | 40         | Male          | negative   | negative   | <i>T/G</i>      | <i>T/C</i>        |
| 25                | 32         | Male          | negative   | negative   | <i>G</i>        | <i>C</i>          |
| 32                | 37         | Male          | negative   | negative   | <i>T</i>        | <i>T</i>          |
| 34                | 37         | Male          | negative   | negative   | <i>T</i>        | <i>T</i>          |
| 39                | 43         | Male          | negative   | negative   | <i>T</i>        | <i>T</i>          |
| 41                | 28         | Male          | negative   | negative   | <i>T</i>        | <i>T</i>          |
| 42                | 45         | Male          | negative   | negative   | <i>T</i>        | <i>T</i>          |
| 10                | 35         | Male          | borderline | negative   | <i>T</i>        | <i>T</i>          |
| 35                | 34         | Male          | borderline | negative   | <i>T</i>        | <i>T</i>          |

**Table S6. Primers/probes used for Sanger sequencing, PCR and qRT-PCR, related to the STAR Methods section.**

| <b>Primer Name</b>                         | <b>Sequence</b>                                                              |
|--------------------------------------------|------------------------------------------------------------------------------|
| ZIKV (+) vRNA-RT                           | <i>TACTTGTACAGCTCGTCCATGCCACTAACGTTCT<br/>TTTGACAGACAT</i>                   |
| ZIKV (+) vRNA-PCR forward                  | <i>CCGCTGCCCAACACAAG</i>                                                     |
| ZIKV (+) vRNA-PCR reverse                  | <i>TACTTGTACAGCTCGTCCATG</i>                                                 |
| ZIKV (+) vRNA-PCR probe                    | <i>5’-/56-<br/>FAM/AGCCTACCT/ZEN/TGACAAGCAATCAGACA<br/>CTCAA/3IABkFQ/-3’</i> |
| ZIKV (-) vRNA-RT                           | <i>AACAGCCACAACGTCTATATCCCGCTGCCCAAC<br/>ACAAG</i>                           |
| ZIKV (-) vRNA-PCR forward                  | <i>AACAGCCACAACGTCTATATC</i>                                                 |
| ZIKV (-) vRNA-PCR reverse                  | <i>CCACTAACGTTCTTTTGCAGACAT</i>                                              |
| ZIKV (-) vRNA-PCR probe                    | <i>5’-/56-<br/>FAM/TTGAGTGTC/ZEN/TGATTGCTTGTCAAGGTA<br/>GGCT/3IABkFQ/-3’</i> |
| SARS-CoV-2-TRS-L                           | <i>CTCTTGTAGATCTGTTCTCTAAACGAAC</i>                                          |
| SARS-CoV-2-TRS-N                           | <i>GGTCCACCAAACGTAATGCG</i>                                                  |
| Human <i>ACTB</i> -RT                      | <i>CCTGGATAGCAACGTACATGG</i>                                                 |
| Human <i>ACTB</i> -PCR forward             | <i>CCTTGCACATGCCGGAG</i>                                                     |
| Human <i>ACTB</i> -PCR reverse             | <i>ACAGAGCCTCGCCTTTG</i>                                                     |
| Human <i>ACTB</i> -PCR probe               | <i>5’-<br/>/5HEX/TCATCCATG/ZEN/GTGAGCTGGCGG/3IABk<br/>FQ/-3’</i>             |
| Human <i>ACTB</i> -PCR forward             | <i>ACCTTCTACAATGAGCTGCG</i>                                                  |
| Human <i>ACTB</i> -PCR reverse             | <i>CCTGGATAGCAACGTACATGG</i>                                                 |
| Human <i>NDUFA4</i> -PCR forward           | <i>CATCGGTCAGGCCAAGAA</i>                                                    |
| Human <i>NDUFA4</i> -PCR reverse           | <i>GGGCTCTGGGTTATTTCTGTC</i>                                                 |
| Human mitochondrial <i>CYTB</i><br>forward | <i>AACAGCCTTCATAGGCTATGTCCT</i>                                              |
| Human mitochondrial <i>CYTB</i><br>reverse | <i>GGACTGTCTACTGAGTAGCCTCCT</i>                                              |
| Human mitochondrial <i>ND4</i><br>forward  | <i>GCTCACACCTCATATCCTCCCTAC</i>                                              |
| Human mitochondrial <i>ND4</i><br>reverse  | <i>CAATATTGGCTAAGAGGGAGTGGG</i>                                              |
| Human mitochondrial 16S<br>forward         | <i>CCAACGGAACAAGTTACCCTAGGG</i>                                              |

|                                                   |                                |
|---------------------------------------------------|--------------------------------|
| Human mitochondrial 16S reverse                   | CCGGTCTGAACTCAGATCACGTAG       |
| Human <i>ISG15</i> forward                        | CGCAGATCACCCAGAAGATCG          |
| Human <i>ISG15</i> reverse                        | TTCGTGCGATTTGTCCACCA           |
| Human <i>IRF7</i> forward                         | CCCACGCTATACCATCTACCT          |
| Human <i>IRF7</i> reverse                         | GATGTCGTCATAGAGGCTGTTG         |
| Human nuclear <i>TERT</i> forward                 | CCCTCCTGTCCAGTTTGCATAAAC       |
| Human nuclear <i>TERT</i> reverse                 | TGCTTCCAGACACTTCTCCCCATT       |
| Human NDUFA4 genotyping forward for coding region | GGTCCGTTTCTCTCCTTTCCA          |
| Human NDUFA4 genotyping reverse for coding region | ATGCGGCGAATACAAGAACC           |
| SNP genotyping forward                            | GGGTTGCGGCATTCATTTT            |
| SNP genotyping reverse                            | ACCTTCACCTCCTTCTCTTCT          |
| rs13226817 forward                                | ATACTTCCTAAGAGTCATGCAC         |
| rs13226817 reverse                                | GATTAAGTTGTTTGATTCTTTATTC      |
| rs917172 forward                                  | TGGACCAGAAGATTTGGTTTC          |
| rs917172 reverse                                  | TGAACTAACTTTGAGTAGC            |
| rs10240368 forward                                | AGATGAAATGGAGTGGTGCAG          |
| rs10240368 reverse                                | TGCAACACAAGACTCCATC            |
| rs6945646 forward                                 | TTCTCAAAAACATTCAACCAGAG        |
| rs6945646 reverse                                 | CAGTTACCGGTACCTATC             |
| rs6958970 forward                                 | CAAAAGGTCAAGAGCTAGCCC          |
| rs6958970 reverse                                 | AATTTGATTTTCTTTTCCAAAACACTCAAC |
| rs6954962 forward                                 | AATCCATGAAAAAGCTAGCCC          |
| rs6954962 reverse                                 | CAGCCTTCTCAACAGTGTC            |
| rs917171 forward                                  | TAGGTACCACGAACATTTGAC          |
| rs917171 reverse                                  | TCGATAGAGAAATGTTCTG            |
| rs917173 forward                                  | TTGGTCTTGAGTGGCTAGCCC          |
| rs917173 reverse                                  | TGAAATTAGAATTTCTGGGTTTAAGGATG  |
| rs12386620 forward                                | AATTAGCCGACTGTTTTATAATTC       |
| rs12386620 reverse                                | TTAATCTTCCTTAATTTTGAGC         |
| rs2906374 forward                                 | TTAACTGTTCTTGCTAGTTTATGG       |
| rs2906374 reverse                                 | ATGGTAAGACCCGGTAAC             |
| rs722639 forward                                  | GAATAAAACAGTTTGTATTCGGTTC      |
| rs722639 reverse                                  | AATTTATCAAAGTAGCTTCTG          |



**Table S7. Antibodies used for immunocytochemistry, intracellular flow cytometry analysis and western blotting analysis, related to the STAR Methods section.**

| Usage                                             | Antibody                              | Clone #     | Host   | Catalog #        | Vendor            | Dilution |
|---------------------------------------------------|---------------------------------------|-------------|--------|------------------|-------------------|----------|
| Immunocytochemistry                               | Anti-DNA                              | AC-30-10    | Mouse  | CBL186           | Millipore         | 1:100    |
| Immunocytochemistry                               | Anti-HSP60                            | Polyclonal  | Rabbit | NBP1-77397       | Novus             | 1:100    |
| Immunocytochemistry                               | Anti-Flavivirus group antigen         | D1-4G2-4-15 | Mouse  | GTX57154         | GeneTex           | 1:100    |
| Immunocytochemistry                               | Anti-Flavivirus group antigen         | D1-4G2-4-15 | Mouse  | MAB10216-I-100UG | Millipore         | 1:1000   |
| Immunocytochemistry & Intracellular flowcytometry | Anti-DENV NS3 protein                 | Polyclonal  | Rabbit | GTX124252        | GeneTex           | 1:500    |
| Immunocytochemistry                               | Anti-human NANOG                      | Polyclonal  | Goat   | AF1997           | R & D             | 1:500    |
| Immunocytochemistry                               | Anti-OCT-3/4 Antibody                 | C-10        | Mouse  | sc-5279          | Santa Cruz        | 1:100    |
| Immunocytochemistry                               | Anti-SOX2                             | D6D9        | Rabbit | 3579             | Cell Signaling    | 1:400    |
| Immunocytochemistry                               | TRA-1-60 Antibody                     | TRA-1-60    | Mouse  | 560071           | BD Biosciences    | 1:100    |
| Immunocytochemistry                               | TRA-1-81 Antibody                     | TRA-1-81    | Mouse  | 14-8883-82       | Thermo Scientific | 1:100    |
| Immunocytochemistry & Western blot                | Anti-NDUFA4                           | Polyclonal  | Rabbit | ab129752         | Abcam             | 1:200    |
| Immunocytochemistry                               | Anti-FOXJ1                            | 2A5         | Mouse  | 14-9965-82       | Thermo Scientific | 1:500    |
| Immunocytochemistry                               | Anti-Mucin 5AC                        | 45M1        | Mouse  | ab3649           | Abcam             | 1:100    |
| Immunocytochemistry                               | Anti-E-Cadherin                       | 4A2         | Mouse  | 14472            | Cell Signaling    | 1:200    |
| Immunocytochemistry                               | Anti-SARS-CoV/SARS-CoV-2 Nucleocapsid | Monoclonal  | Rabbit | 40143-R001       | SinoBiological    | 1:1000   |

|                     |                                                          |            |         |           |                   |         |
|---------------------|----------------------------------------------------------|------------|---------|-----------|-------------------|---------|
| Immunocytochemistry | Anti-Acetyl- $\alpha$ -Tubulin (Lys40)                   | D20G3      | Rabbit  | 5335S     | Cell Signaling    | 1:800   |
| Immunocytochemistry | Anti-MAP2                                                | Polyclonal | Chicken | ab5392    | Abcam             | 1:1000  |
| Immunocytochemistry | Alexa Fluor 594 anti-Mouse IgG (H+L) Secondary Antibody  | Polyclonal | Donkey  | A-21203   | Thermo Scientific | 1:500   |
| Immunocytochemistry | Alexa Fluor 488 anti-Rabbit IgG (H+L) Secondary Antibody | Polyclonal | Donkey  | A-21206   | Thermo Scientific | 1:500   |
| Western blot        | Anti- $\beta$ actin                                      | 15G5A11/E2 | Mouse   | MA1-140   | Thermo Scientific | 1:5000  |
| Western blot        | 680RD Donkey anti-Mouse IgG Secondary Antibody           | Polyclonal | Donkey  | 926-68072 | Li-Cor            | 1:15000 |
| Western blot        | 800CW Donkey anti-Rabbit IgG Secondary Antibody          | Polyclonal | Donkey  | 926-32213 | Li-Cor            | 1:15000 |
